# Supplementary material for: RIPK3-MLKL-mediated necroinflammation contributes to AKI progression to CKD
Source: PubMed Central journal article supplement (PMC6115414; doi:10.1038/s41419-018-0936-8), 2018-08-29
Supplement: 41419_2018_936_MOESM1_ESM.pdf [file 41419_2018_936_MOESM1_ESM.pdf]

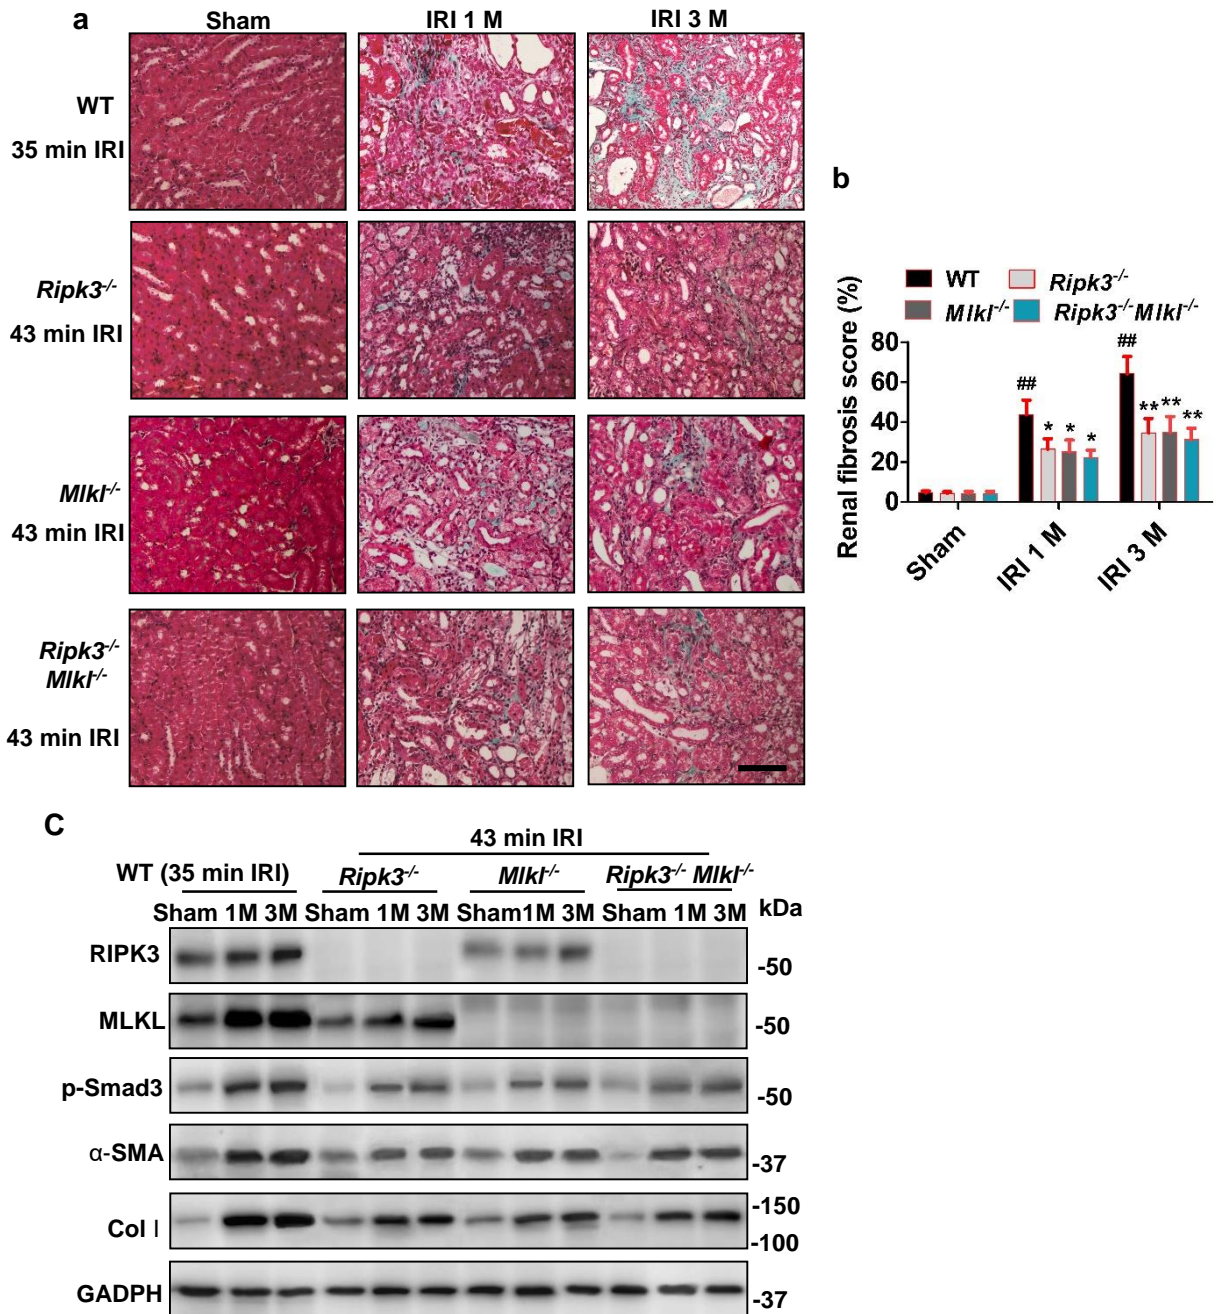

**Fig. S1 Both RIPK3 and MLKL contributed to renal fibrosis after IRI.** WT mice were subjected to renal IRI with 35-min ischemia and all knock out mice were subjected to IRI with 43-min ischemia. n=6. (a) Kidney morphology by Masson's trichrome staining. Representative micrographs in kidney sections. Bar=100  $\mu$ m. (b) Renal fibrosis scores obtained from Masson's trichrome-stained sections were analyzed with Image J. n=6. <sup>##</sup>*P*<0.01 versus WT sham group; <sup>\*</sup>*P*<0.05 versus WT IRI, <sup>\*\*</sup>*P*<0.01 versus WT IRI. (c) Representative immunoblot for RIPK3, MLKL, p-Smad3,  $\alpha$ -SMA, Col I, and  $\beta$ -actin by Western blot in total kidney lysates.
