# Supplementary material for: RIPK3-MLKL-mediated necroinflammation contributes to AKI progression to CKD
Source: PubMed Central journal article supplement (PMC6115414; doi:10.1038/s41419-018-0936-8), 2018-08-29
Supplement: 41419_2018_936_MOESM2_ESM.pdf [file 41419_2018_936_MOESM2_ESM.pdf]

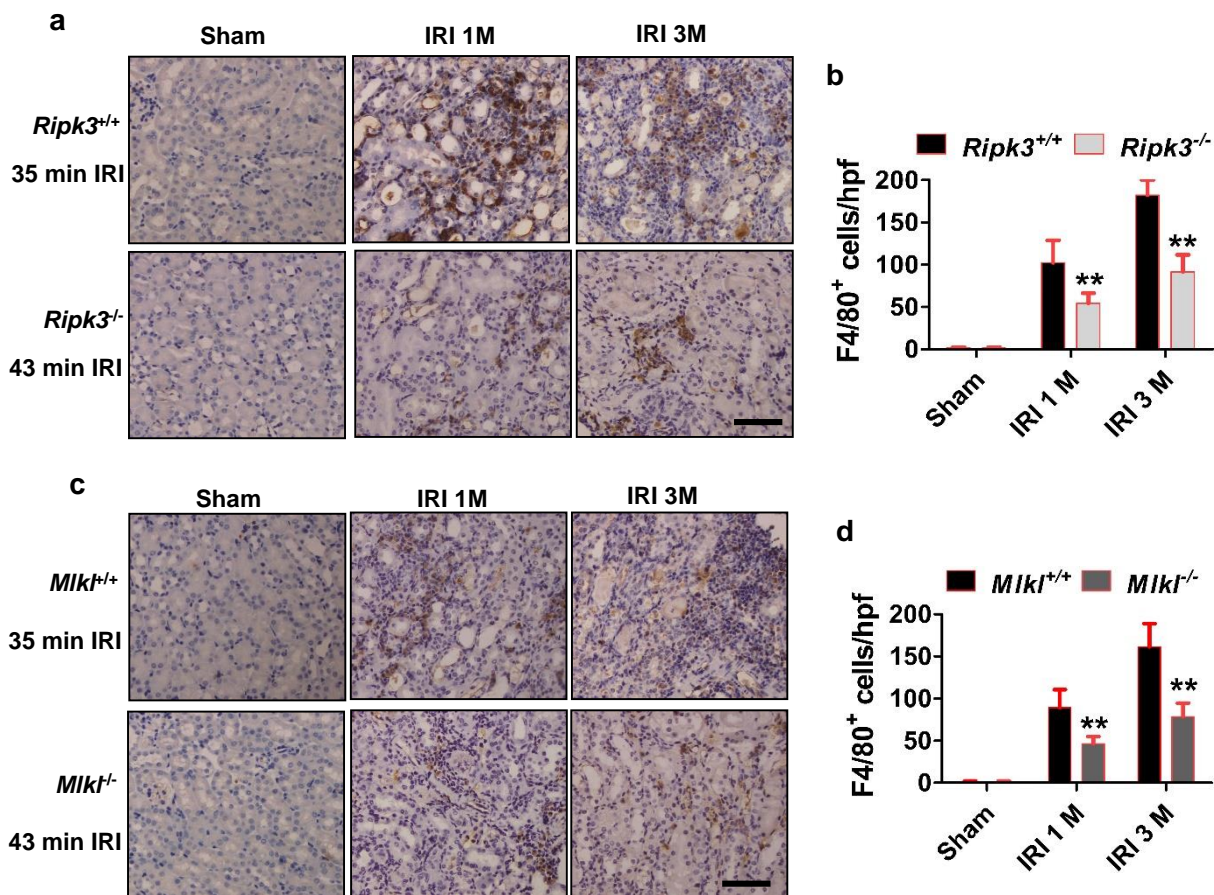

**Fig. S2** *Ripk3*<sup>-/-</sup> and *Mikt*<sup>-/-</sup> mice reduced macrophage recruitment in tubulointerstitium post IRI. WT mice underwent renal IRI with 35-min ischemia and all gene knockout mice underwent renal IRI with 43-min ischemia. n=6. (a, c) Representative images of immunohistochemistry of kidney tissues with the monocytes-macrophage marker F4/80<sup>+</sup> at 1, 3 months following IRI. Bar=100  $\mu$ M. (b, d) The number of F4/80<sup>+</sup> cells per hpf was quantified. \*\**P*<0.01 versus WT group.
