# Supplementary material for: RIPK3-MLKL-mediated necroinflammation contributes to AKI progression to CKD
Source: PubMed Central journal article supplement (PMC6115414; doi:10.1038/s41419-018-0936-8), 2018-08-29
Supplement: 41419_2018_936_MOESM3_ESM.pdf [file 41419_2018_936_MOESM3_ESM.pdf]

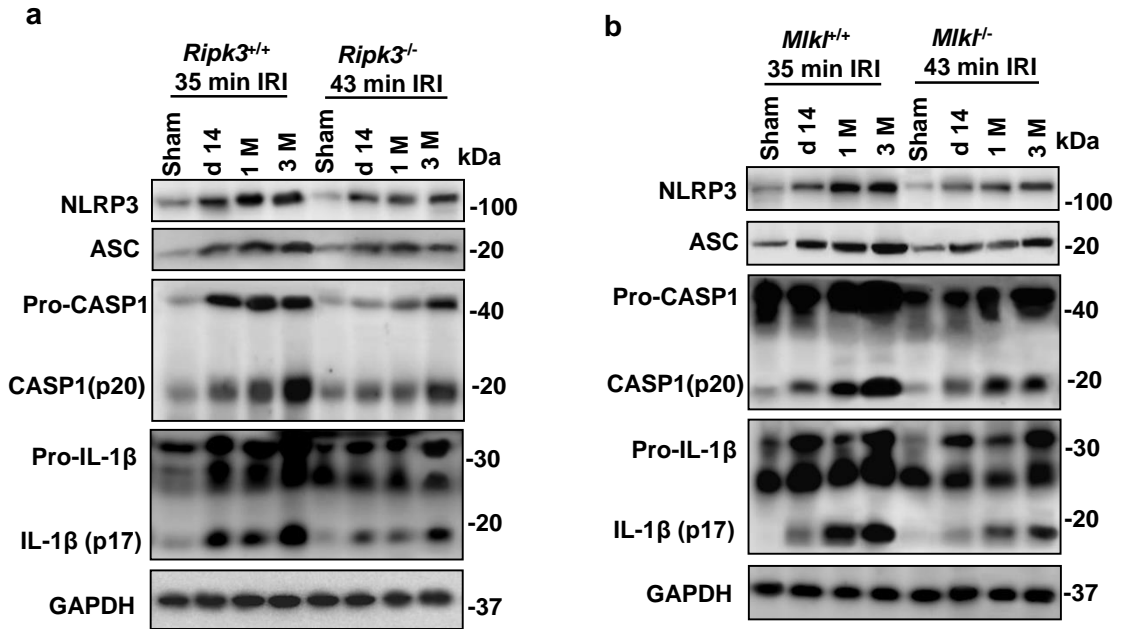

**Fig. S3 *Ripk3* or *Mik1* deficiency reduced NLRP3 inflammasome activation post IRI.** All mice underwent renal IRI as Fig. S2. (a, b) Expression of NLRP3, ASC, the active caspase-1 and the mature (processed) IL-1β in total lysates of kidneys were assessed by Western blot analysis. GAPDH was used as the loading control. n=4.
